# Supplementary material for: Catalytic upgrading of lactose: a rest raw material from the dairy industry
Source: Royal Society of Chemistry journal article supplement (doi:10.1039/c7gc00741h), 2017-01-01

Supporting Informations

**Catalytic upgrading of lactose:  
a rest raw material from the dairy industry**

F. Zaccheria<sup>a</sup>, M. Mariani,<sup>a</sup> N. Scotti<sup>a</sup>, R. Psaro<sup>a</sup> and N. Ravasio<sup>a</sup>

CNR, Institute of Molecular Science and Technology, Via Golgi 19, 20133 Milano, Italy

e-mail: [n.ravasio@istm.cnr.it](mailto:n.ravasio@istm.cnr.it)

**Table S1** - Data referring to Figure 1 in the manuscript.

| T          | t (h) | Lactose (% mol) | Lactitol (% mol) | Glucose (% mol) | Galactose (% mol) | Reduced (% mol) |
|------------|-------|-----------------|------------------|-----------------|-------------------|-----------------|
| <b>150</b> | 0     | 100             | 0                | 0               | 0                 | 0               |
|            | 1     | 63              | 19               | 6               | 7                 | 1               |
|            | 3     | 38              | 18               | 13              | 14                | 11              |
|            | 6     | 24              | 12               | 16              | 18                | 23              |
| <b>160</b> | 0     | 100             | 0                | 0               | 0                 | 0               |
|            | 1     | 50              | 14               | 13              | 15                | 8               |
|            | 3     | 20              | 6                | 21              | 26                | 25              |
|            | 6     | 5               | 3                | 18              | 17                | 57              |
| <b>180</b> | 0     | 100             | 0                | 0               | 0                 | 0               |
|            | 1     | 2               | 0                | 17              | 19                | 61              |
|            | 3     | 0               | 0                | 14              | 10                | 70              |
|            | 6     | 0               | 0                | 4               | 2                 | 75              |
| <b>200</b> | 0     | 100             | 0                | 0               | 0                 | 0               |
|            | 1     | 0               | 0                | 4               | 7                 | 59              |
|            | 3     | 0               | 0                | 2               | 1                 | 68              |
|            | 6     | 0               | 0                | 0               | 1                 | 41              |

**Figure S1** – Reaction profile of lactose hydrolysis + reduction with Cu/SiO<sub>2</sub> (180°C, 10 atm, 200 mg cat, 1 g lactose, 40 mL H<sub>2</sub>O)

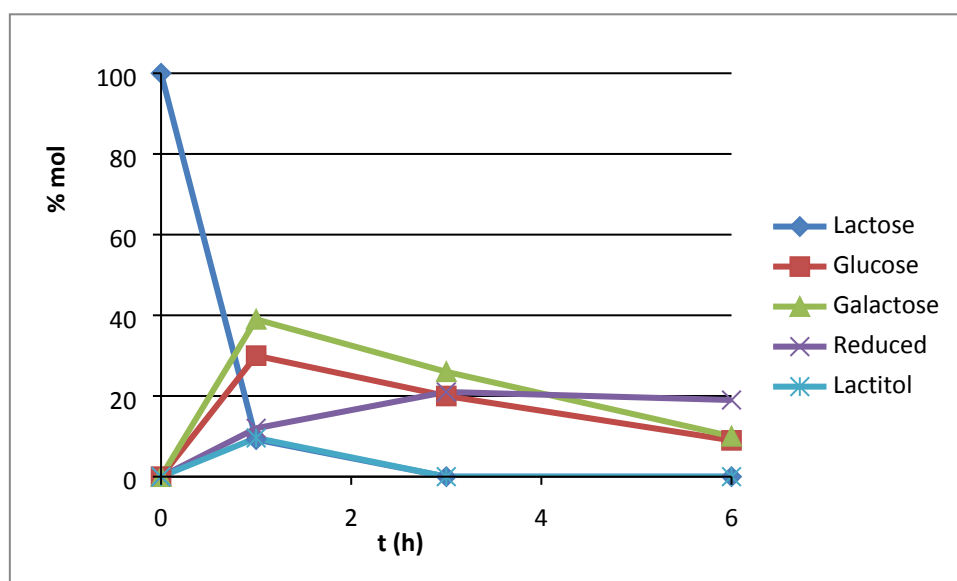

**Figure S2** – Comparison of  $^1\text{H-NMR}$  of raw reaction mixture and the one of dulcitol, obtained by crystallisation with EtOH .

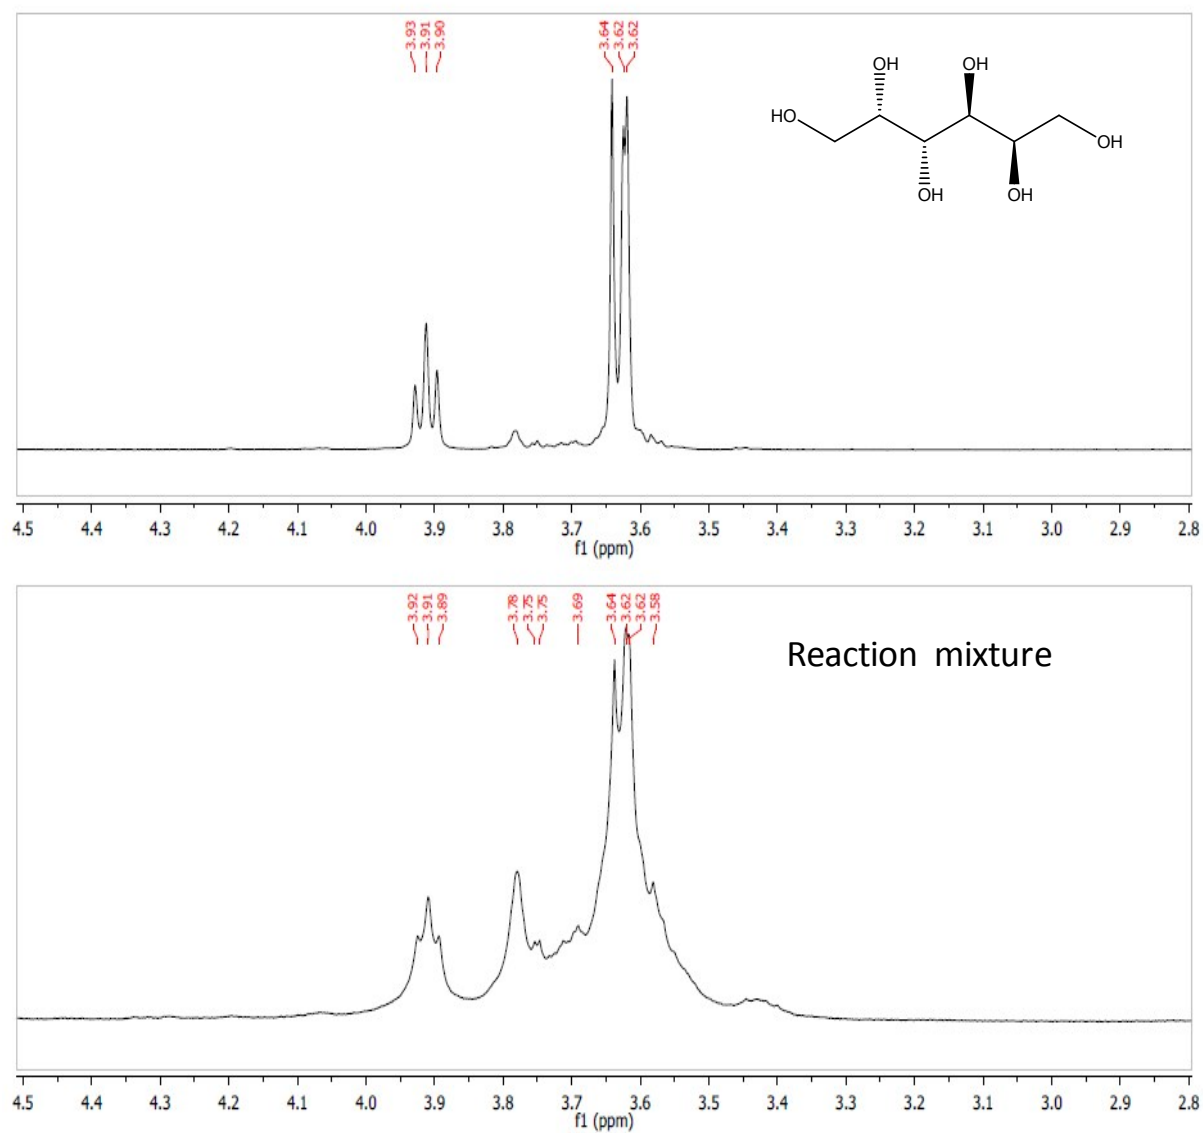

Supplement: c7gc00741h1.pdf [file c7gc00741h1.pdf]
